## CORRECTION

# Steroid-like signalling by interferons: making sense of specific gene activation by cytokines

H. M. JOHNSON, E. N. NOON-SONG, K. KEMPPAINEN and C. M. AHMED

Volume 443 (2012), pp. 329–338

On p. 332, the third paragraph, beginning “Others have reported...”, should read “Others have reported the direct association of phosphorylated STAT1 $\alpha$  in complexes with IMP $\alpha$  [9–11]. All of these NLSs were non-classical. The similarities and differences between the findings in these reports are discussed in detail elsewhere [2].”

In addition references 9 and 11 should be replaced with the following:

- 9 McBride, K. M., Banninger, G., McDonald, C. and Reich, N. C. (2002) Regulated nuclear import of the STAT1 transcription factor by direct binding of importin- $\alpha$ . *EMBO J.* **21**, 1754–1763
- 11 Meyer, T., Begitt, A., Lodige, I., vanRossum, M. and Vinkemeier, U. (2002) Constitutive and IFN $\gamma$ -induced nuclear import of STAT1 proceed through independent pathways. *EMBO J.* **21**, 344–354
